# Supplementary material
Source: Frontiers journal article supplement (https://www.frontiersin.org/articles/302999)
Supplement: Data_Sheet_1.pdf [file Data_Sheet_1.pdf]

## Appendix

Each sentence carrier with both the corresponding congruent target (listed first) and conflicting target (listed last). In the final column, we list the proportion of respondents that completed the sentence carrier with the congruent target in the online sentence completion questionnaire.

| Sentence                               | Target Word                            | Proportion of Responses |
|----------------------------------------|----------------------------------------|-------------------------|
| The horses wait for the opening of the | gate (congruent)<br>bait (conflicting) | 72.80%                  |
| The fish takes the hook's              | bait<br>gate                           | 81.35%                  |
| The boy eats ice cream from a          | cone<br>bone                           | 64.75%                  |
| The dog chews on a                     | bone<br>cone                           | 71.55%                  |
| The mice are afraid of the             | cat<br>bat                             | 72.03%                  |
| The boy hits the ball with the         | bat<br>cat                             | 91.67%                  |
| The boy builds a tower with his        | blocks<br>clocks                       | 47.55%                  |
| To check the time, look at the         | clock<br>block                         | 82.50%                  |
| The dog drinks water from the          | bowl<br>coal                           | 83.66%                  |
| Santa gives bad children a sack of     | coal<br>bowl                           | 98.59%                  |
| The teenager is excited to drive the   | car<br>bar                             | 88.13%                  |
| The man orders a drink at the          | bar<br>car                             | 93.80%                  |
| A fruit with fuzzy skin is a           | peach<br>beach                         | 88.49%                  |
| The boy made a sandcastle at the       | beach<br>peach                         | 96.68%                  |
| After falling down, his head had a     | bump<br>pump                           | 55.96%                  |

|                                          |                 |         |
|------------------------------------------|-----------------|---------|
| The man inflates the tire with a         | pump<br>bump    | 90.72%  |
| After dinner, the man paid his           | bill<br>pill    | 72.80%  |
| To control cholesterol, the woman took a | pill<br>bill    | 96.39%  |
| The man put gas in the car's             | tank<br>bank    | 94.16%  |
| The boy put his money in the             | bank<br>tank    | 80%     |
| Stewards urged the passenger to take his | seat<br>feet    | 83.59%  |
| Ballerinas need shoes that fit their     | feet<br>seat    | 91.61%  |
| To cool herself, she turned on the       | fan<br>van      | 81.33%  |
| The florist delivered flowers in his     | van<br>fan      | 52.00%  |
| The boy shuffled a deck of               | cards<br>guards | 100.00% |
| The castle entrance was watched by       | guards<br>cards | 87.05%  |
| She put honey and lemon in her           | tea<br>key      | 95.19%  |
| The man unlocked the door with a         | key<br>tea      | 98.00%  |
| A genie appears if you rub the           | lamp<br>ramp    | 98.30%  |
| The skate park has many                  | ramp<br>lamp    | 62.50%  |
| The quarry was filled with               | rocks<br>locks  | 64.76%  |
| The boy secured his bike with a          | lock<br>rock    | 81.41%  |
| Cleaning the yard is easy with a         | rake<br>lake    | 95.10%  |
| The man goes fishing on the              | lake<br>rake    | 47.96%  |
| A suit is incomplete without a           | tie<br>pie      | 93.06%  |
| After picking apples, the girl baked a   | pie<br>tie      | 91.80%  |

|                                |              |        |
|--------------------------------|--------------|--------|
| The man raised the ship's      | sail<br>veil | 57.85% |
| On her head the bride wore a   | veil<br>sail | 86.66% |
| The exit was marked by a large | sign<br>vine | 98.70% |
| The man picks grapes off the   | vine<br>sign | 84.31% |

### *Neutral Sentence Carriers*

Each sentence carrier for the neutral condition with the final word targets presented in the study. In the results of the online sentence completion questionnaire, final word responses for these sentences were extremely distributed and the following sentence carriers yielded at minimum 41 unique possible final words.

| Sentence                  | Final Word       |
|---------------------------|------------------|
| He read about the         | gate<br>bait     |
| He pointed at the         | cone<br>bone     |
| She read about the        | cat<br>bat       |
| She looked at the         | blocks<br>clocks |
| He pointed at the         | bowl<br>coal     |
| He walks to the           | car<br>bar       |
| The girl really likes the | peach<br>beach   |
| The boy looks at the      | pump<br>bump     |
| They talk about the       | bill<br>pill     |
| He reads about the        | tank<br>bank     |

|                       |                 |
|-----------------------|-----------------|
| He looked at the      | seat<br>feet    |
| He pointed at the     | fan<br>van      |
| They talked about the | cards<br>guards |
| He picked up the      | tea<br>key      |
| She looked at the     | lamp<br>ramp    |
| He looked at the      | lock<br>rock    |
| She read about the    | rake<br>lake    |
| She picked up the     | tie<br>pie      |
| They talked about the | sail<br>veil    |
| They looked at the    | sign<br>vine    |
